# Supplementary material
Source: publisher figshare collection journal article supplement (https://acs.figshare.com/ndownloader/files/21001278)
Supplement: Supplementary file 1 [file 21001278]

## Supporting information

### Isobaric Vapor-Liquid Equilibrium Data for water (1) + 2-methyl-propan-1-ol (2), 2-methyl-propan-1-ol (1) + pyridine (2), and water (1) + 2-methyl-propan-1-ol (2) + pyridine (3) systems

*Kuveneshan Moodley\*, Mishqah Hussain, Paramespri Naidoo, Theasha Naidoo*

Thermodynamics Research Unit, School of Engineering, University of KwaZulu-Natal,  
Howard College Campus, King George V Avenue, Durban, 4041, South Africa

\*To whom correspondence should be addressed: [moodleyk6@ukzn.ac.za](mailto:moodleyk6@ukzn.ac.za); Tel.: +27  
31 2601519

Table S1. Shimadzu GC2014 operating conditions.

| Operating conditions           |                                 |
|--------------------------------|---------------------------------|
| Carrier gas                    | Helium                          |
| Carrier gas flow rate (mL/min) | 30                              |
| Detector type                  | TCD                             |
| Column                         | PORAPAK-Q column (2 m x 2.2 mm) |
| Injector temperature (K)       | 513.15                          |
| Column temperature (K)         | 513.15                          |
| Detector temperature (K)       | 513.15                          |

Example calculation for combined standard uncertainty in pressure:

$$\begin{aligned}
 u_c(P) &= \left( (u(P_{\text{supplier}}))^2 + (u(P_{\text{calibration accuracy}}))^2 + (u(P_{\text{repeatability}}))^2 \right)^{\frac{1}{2}} \quad (\text{S1}) \\
 &= (0.08^2 + 0.1^2 + 0.1^2)^{\frac{1}{2}} \\
 &= 0.163 \text{ kPa}
 \end{aligned}$$

And for combined expanded uncertainty in pressure.

$$\begin{aligned}
 U_c(P) &= k * u_c(P) \quad (\text{S2}) \\
 &= 2 * 0.163 \\
 &= 0.33 \text{ kPa}
 \end{aligned}$$

## Consistency testing

Table S2. Results of the consistency tests.

| System                                  | Calculated criterion                                                                     |                |                                                                   | Consistency test result |
|-----------------------------------------|------------------------------------------------------------------------------------------|----------------|-------------------------------------------------------------------|-------------------------|
|                                         | Infinite dilution test of Kojima et al. <sup>26</sup><br>(Criteria: I <sub>j</sub> < 30) |                | Point test of Fredenslund <sup>27</sup><br>(Criteria: AAD < 0.01) |                         |
|                                         | I <sub>1</sub>                                                                           | I <sub>2</sub> | AAD                                                               |                         |
| water (1) + 2-methyl-propan-1-ol (2)    |                                                                                          |                |                                                                   |                         |
| <i>P/kPa</i> = 50.9                     | 19.567                                                                                   | 8.613          | 0.002                                                             | Passed both tests       |
| <i>P/kPa</i> = 80.1                     | 16.836                                                                                   | 12.719         | 0.003                                                             | Passed both tests       |
| <i>P/kPa</i> = 100.2                    | 5.826                                                                                    | 16.148         | 0.003                                                             | Passed both tests       |
| 2-methyl-propan-1-ol (1) + pyridine (2) |                                                                                          |                |                                                                   |                         |
| <i>P/kPa</i> = 51.1                     | 4.888                                                                                    | 2.111          | 0.001                                                             | Passed both tests       |
| <i>P/kPa</i> = 81.5                     | 2.326                                                                                    | 1.063          | 0.001                                                             | Passed both tests       |
| <i>P/kPa</i> = 101.3                    | 3.643                                                                                    | 1.668          | 0.002                                                             | Passed both tests       |

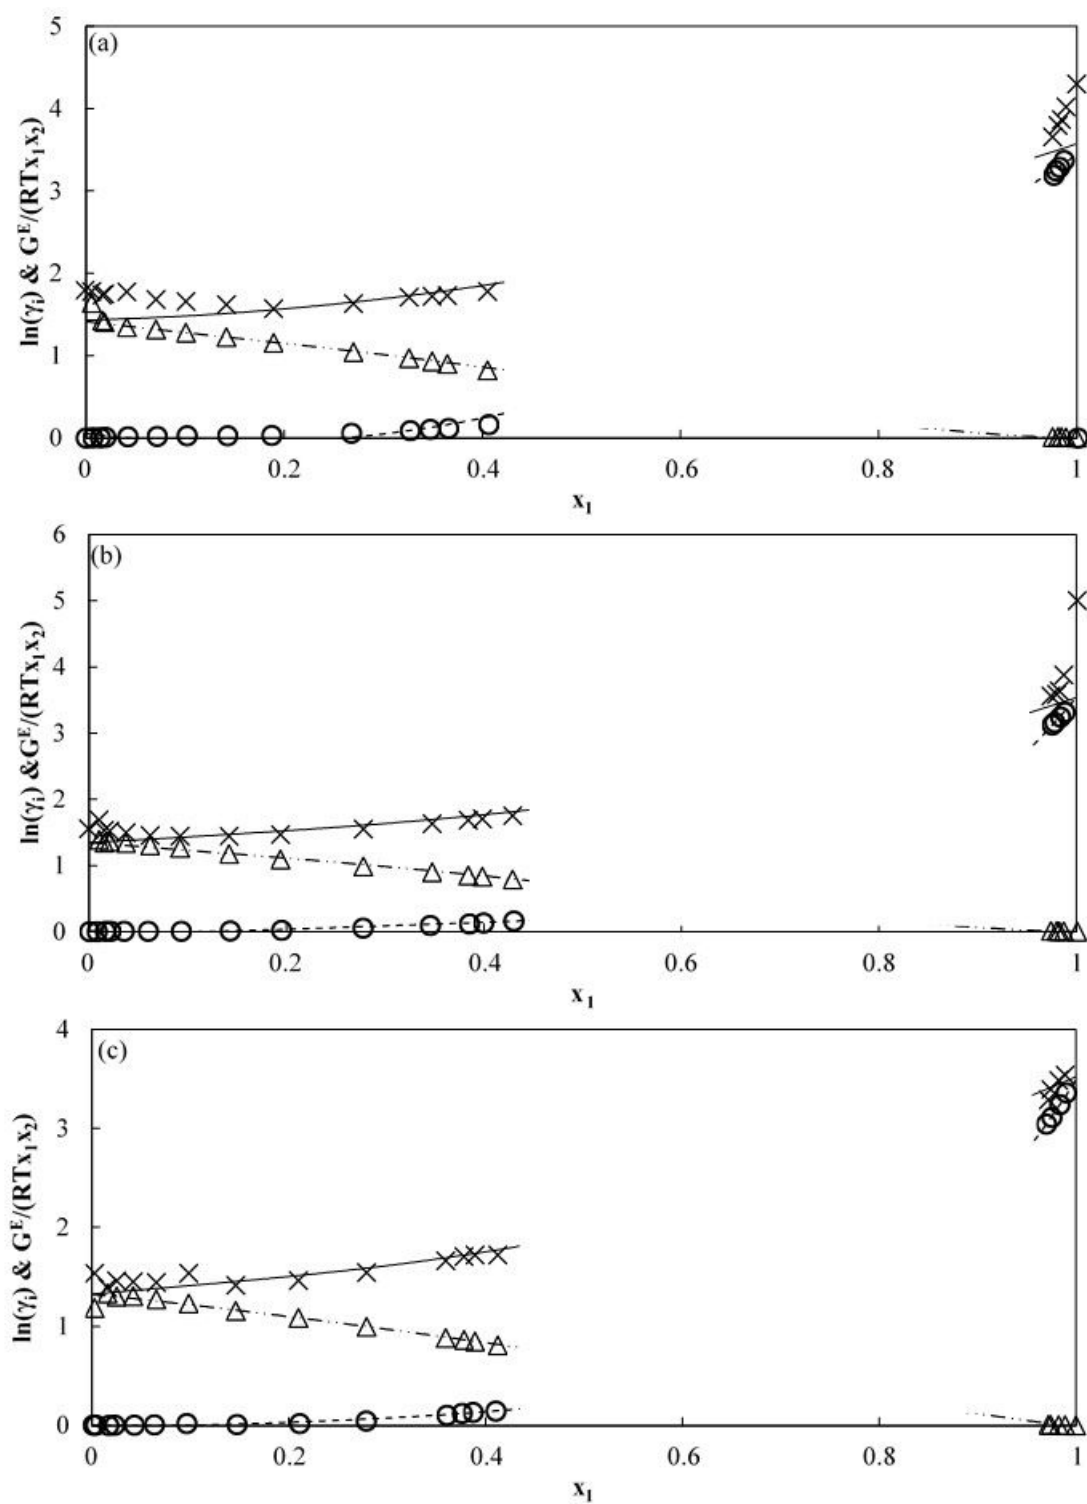

Figure S1. Plots to show coherence of  $\ln\gamma_1$  (--- $\Delta$ ---) and  $\ln\gamma_2$  (--- $\circ$ ---) with  $G^E/(RTx_1x_2)$  (--- $\times$ ---) for the water (1) + 2-methyl-propan-1-ol (2) system at (a) 50.9, (b) 80.9 and (c) 100.2 kPa for the infinite dilution test of Kojima et al.<sup>26</sup>.

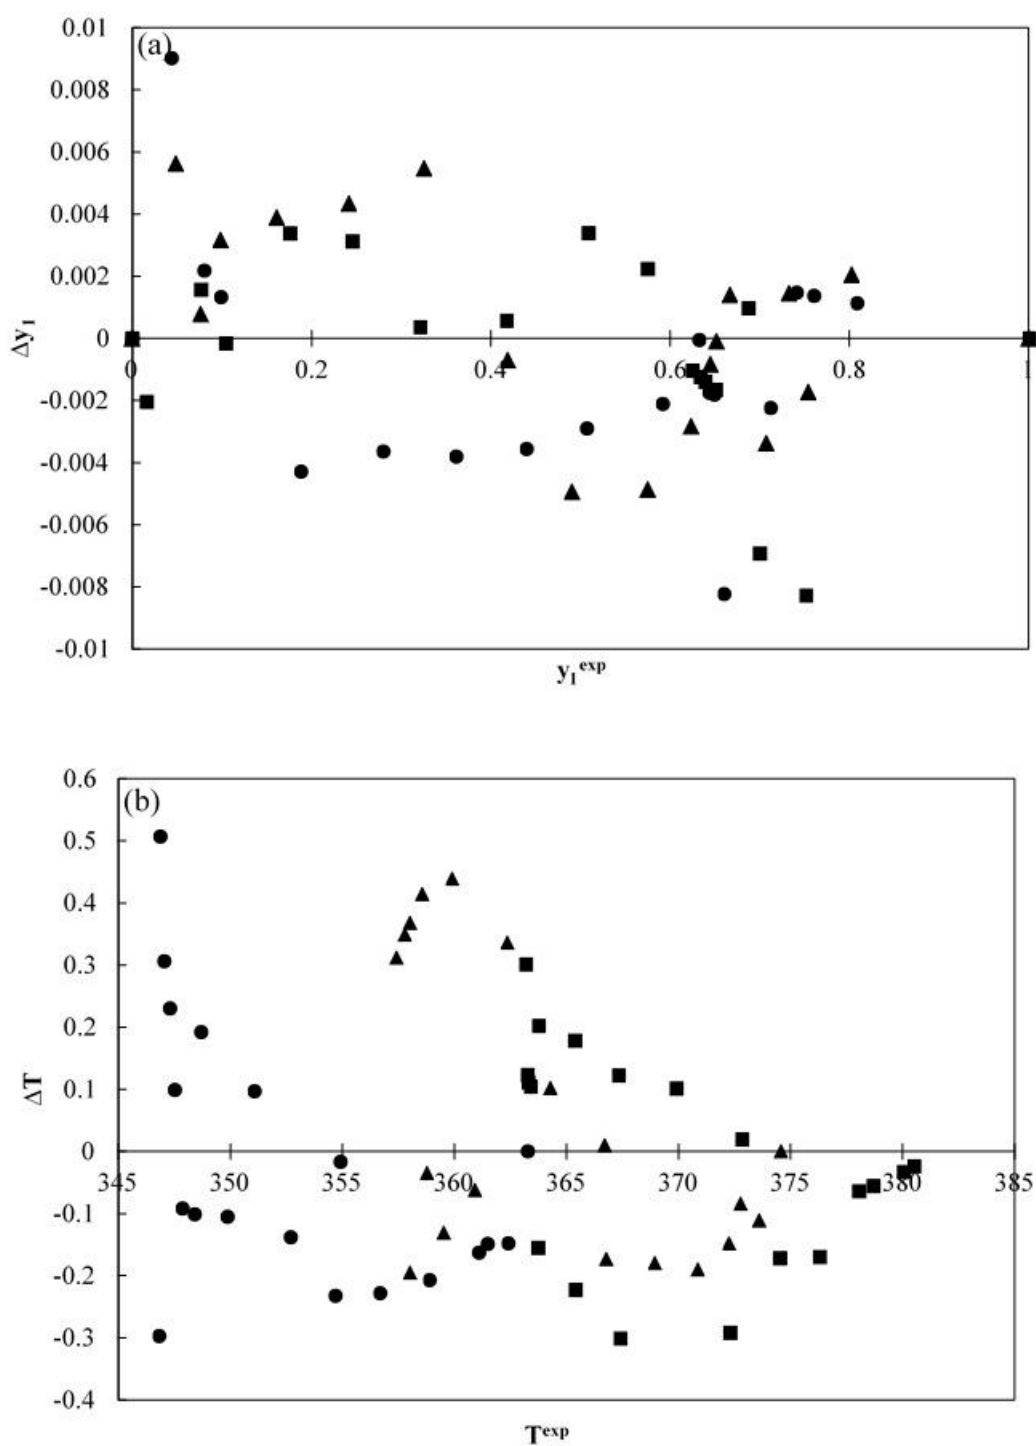

Figure S2. Plot of deviations in (a)  $y$  and (b)  $T$  for the water (1) + 2-methyl-propan-1-ol (2) system at 50.9 (●), 80.9 (▲), 100.2 (■), for use in the point test of Fredenslund <sup>27</sup>.

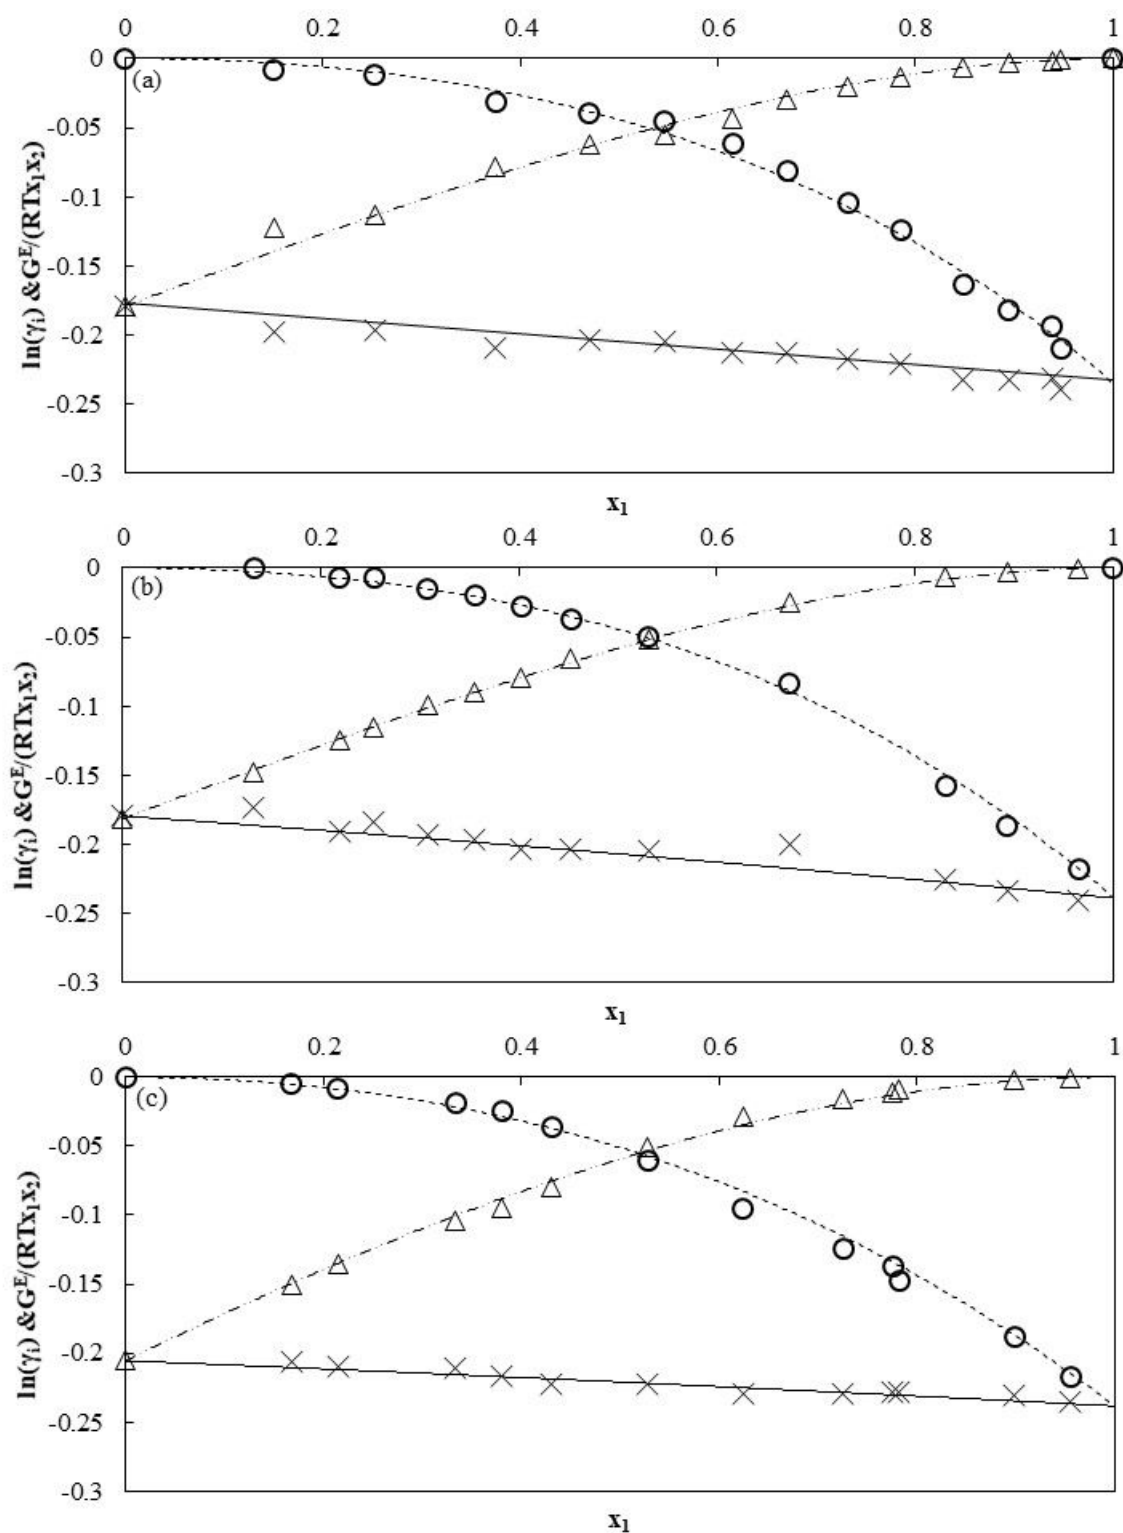

Figure S3. Plots to show coherence of  $\ln\gamma_1$  (--- $\Delta$ ---) and  $\ln\gamma_2$  (--- $\circ$ ---) with  $G^E/(RTx_1x_2)$  (--- $\times$ ---) for the 2-methyl-propan-1-ol (1) + pyridine (2) system at (a) 51.1, (b) 81.5 and (c) 101.3 kPa for the infinite dilution test of Kojima et al.<sup>26</sup>.

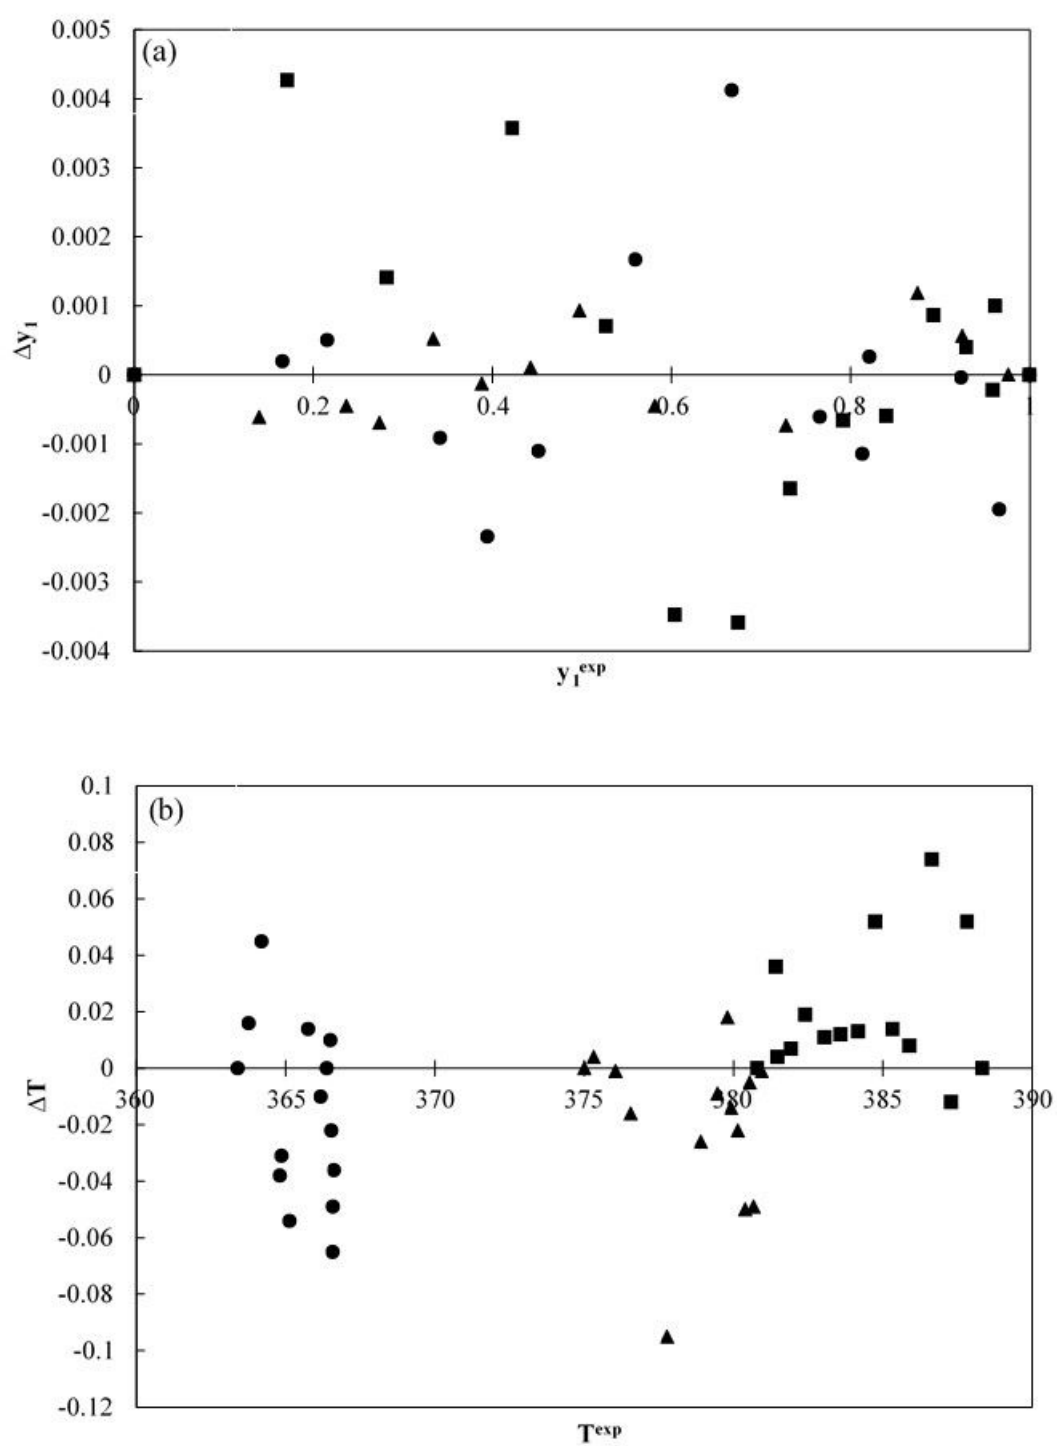

Figure S4. Plot of deviations in (a)  $y$  and (b)  $T$  for the 2-methyl-propan-1-ol (1) + pyridine (2) system at 51.1(●), 81.5 (▲), 101.3 (■), for use in the point test of Fredenslund <sup>27</sup>.
